# Supplementary material for: Topotecan synergizes with CHEK1 (CHK1) inhibitor to induce apoptosis in ovarian cancer cells
Source: BMC Cancer. 2015 Mar 28;15:196. doi: 10.1186/s12885-015-1231-z (PMC4379550; doi:10.1186/s12885-015-1231-z)
Supplement: Additional file 1: — Mutation status of TOP1 gene in the Cancer Cell Line Encyclopedia. [file 12885_2015_1231_MOESM1_ESM.xls]

## Sheet: Sheet1
TOP1 Protein Change	CELL LINE	TISSUE	Variant Classification	Variant Type	Reference Allele	Tumor Allele
p.M247T	SNU308	BILIARY TRACT	Missense_Mutation	SNP	T	C
p.K326R	HCC38	BREAST	Missense_Mutation	SNP	A	G
p.A351D	H4	CENTRAL NERVOUS SYSTEM	Missense_Mutation	SNP	C	A
p.T270A	HEC108	ENDOMETRIUM	Missense_Mutation	SNP	A	G
p.E561K	SUDHL6	HAEMATOPIETIC AND LYMPHOID TISSUE	Missense_Mutation	SNP	G	A
p.S21C	BCP1	HAEMATOPOIETIC AND LYMPHOID TISSUE	Missense_Mutation	SNP	C	G
p.M428T	DND41	HAEMATOPOIETIC AND LYMPHOID TISSUE	Missense_Mutation	SNP	T	C
p.K184E	KARPAS299	HAEMATOPOIETIC AND LYMPHOID TISSUE	Missense_Mutation	SNP	A	G
p.F279L	CW2	LARGE INTESTINE	Missense_Mutation	SNP	T	C
p.M675I	HCT15	LARGE INTESTINE	Missense_Mutation	SNP	G	A
p.M675I	HRT18	LARGE INTESTINE	Missense_Mutation	SNP	G	A
p.D182A	HT55	LARGE INTESTINE	Missense_Mutation	SNP	A	C
p.L173fs	SNU1040	LARGE INTESTINE	Frame_Shift_Ins	Ins	-	A
p.T597M	SNU1040	LARGE INTESTINE	Missense_Mutation	SNP	C	T
	SNU81	LARGE INTESTINE	3'UTR	SNP	C	A
p.K59N	SNU81	LARGE INTESTINE	Missense_Mutation	SNP	G	T
p.R89Q	SNU81	LARGE INTESTINE	Missense_Mutation	SNP	G	A
p.I714T	SNUC2A	LARGE INTESTINE	Missense_Mutation	SNP	T	C
p.W754C	SW48	LARGE INTESTINE	Missense_Mutation	SNP	G	T
p.M305I	HCC1359	LUNG	Missense_Mutation	SNP	G	A
p.K245N	NCIH1618	LUNG	Missense_Mutation	SNP	A	C
p.L325_splice	NCIH526	LUNG	Splice_Site_SNP	SNP	G	A
p.E208K	NCIH596	LUNG	Missense_Mutation	SNP	G	A
p.P235T	NCIH650	LUNG	Missense_Mutation	SNP	C	A
p.K175N	NCIH838	LUNG	Missense_Mutation	SNP	A	T
p.A705S	LNCAPCLONEFGC	PROSTATE	Missense_Mutation	SNP	G	T
p.E221Q	GSS	STOMACH	Missense_Mutation	SNP	G	C
p.G109V	639V	URINARY TRACT	Missense_Mutation	SNP	G	T
p.L360fs	SW1710	URINARY TRACT	Frame_Shift_Del	Del	T	-
